# Supplementary material for: Synthetic matrix enhances transplanted satellite cell engraftment in dystrophic and aged skeletal muscle with comorbid trauma
Source: PubMed Central journal article supplement — Sci Adv. 2018 Aug 15;4(8):eaar4008. doi: 10.1126/sciadv.aar4008 (PMC6093653; doi:10.1126/sciadv.aar4008), 2018-08-15
Supplement: aar4008_SM.pdf [file aar4008_SM.pdf]

## Supplementary Materials for

### **Synthetic matrix enhances transplanted satellite cell engraftment in dystrophic and aged skeletal muscle with comorbid trauma**

Woojin M. Han, Shannon E. Anderson, Mahir Mohiuddin, Daniela Barros, Shadi A. Nakhai, Eunjung Shin, Isabel Freitas Amaral, Ana Paula Pêgo, Andrés J. García\*, Young C. Jang\*

\*Corresponding author. Email: [andres.garcia@me.gatech.edu](mailto:andres.garcia@me.gatech.edu) (A.J.G.); [young.jang@gatech.edu](mailto:young.jang@gatech.edu) (Y.C.J.)

Published 15 August 2018, *Sci. Adv.* **4**, eaar4008 (2018)  
DOI: 10.1126/sciadv.aar4008

#### **The PDF file includes:**

Fig. S1. Isolated primary MuSCs are Pax7<sup>+</sup>.  
Fig. S2. RGD-presenting hydrogels promote MuSC activation and proliferation.  
Fig. S3. RGD-presenting hydrogels promote MuSC differentiation.  
Fig. S4. Pax7/MyoD expression of MuSCs in 4 and 6% 20-kDa PEG-4MAL hydrogels.  
Fig. S5. 1D diffusion assay in PEG-4MAL hydrogels.  
Fig. S6. Synthetic matrix supports higher MuSC proliferation potential than collagen gel.  
Table S1. List of cell-adhesive synthetic peptides and their targets.

#### **Other Supplementary Material for this manuscript includes the following:**

(available at [advances.sciencemag.org/cgi/content/full/4/8/eaar4008/DC1](https://advances.sciencemag.org/cgi/content/full/4/8/eaar4008/DC1))

Movie S1 (.mp4 format). Differentiated myotubes in RGD hydrogels contract in vitro.

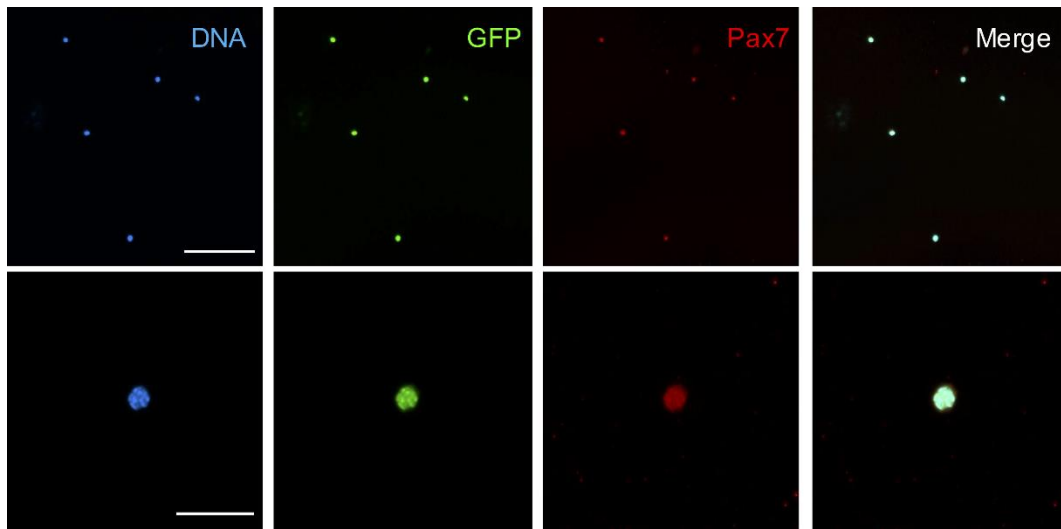

**Fig. S1. Isolated primary MuSCs are Pax7<sup>+</sup>.** Freshly isolated cells were encapsulated in PEG-4MAL hydrogel and immediately fixed and stained. Top row scale bar: 100  $\mu\text{m}$ . Bottom row scale bar: 10  $\mu\text{m}$ .

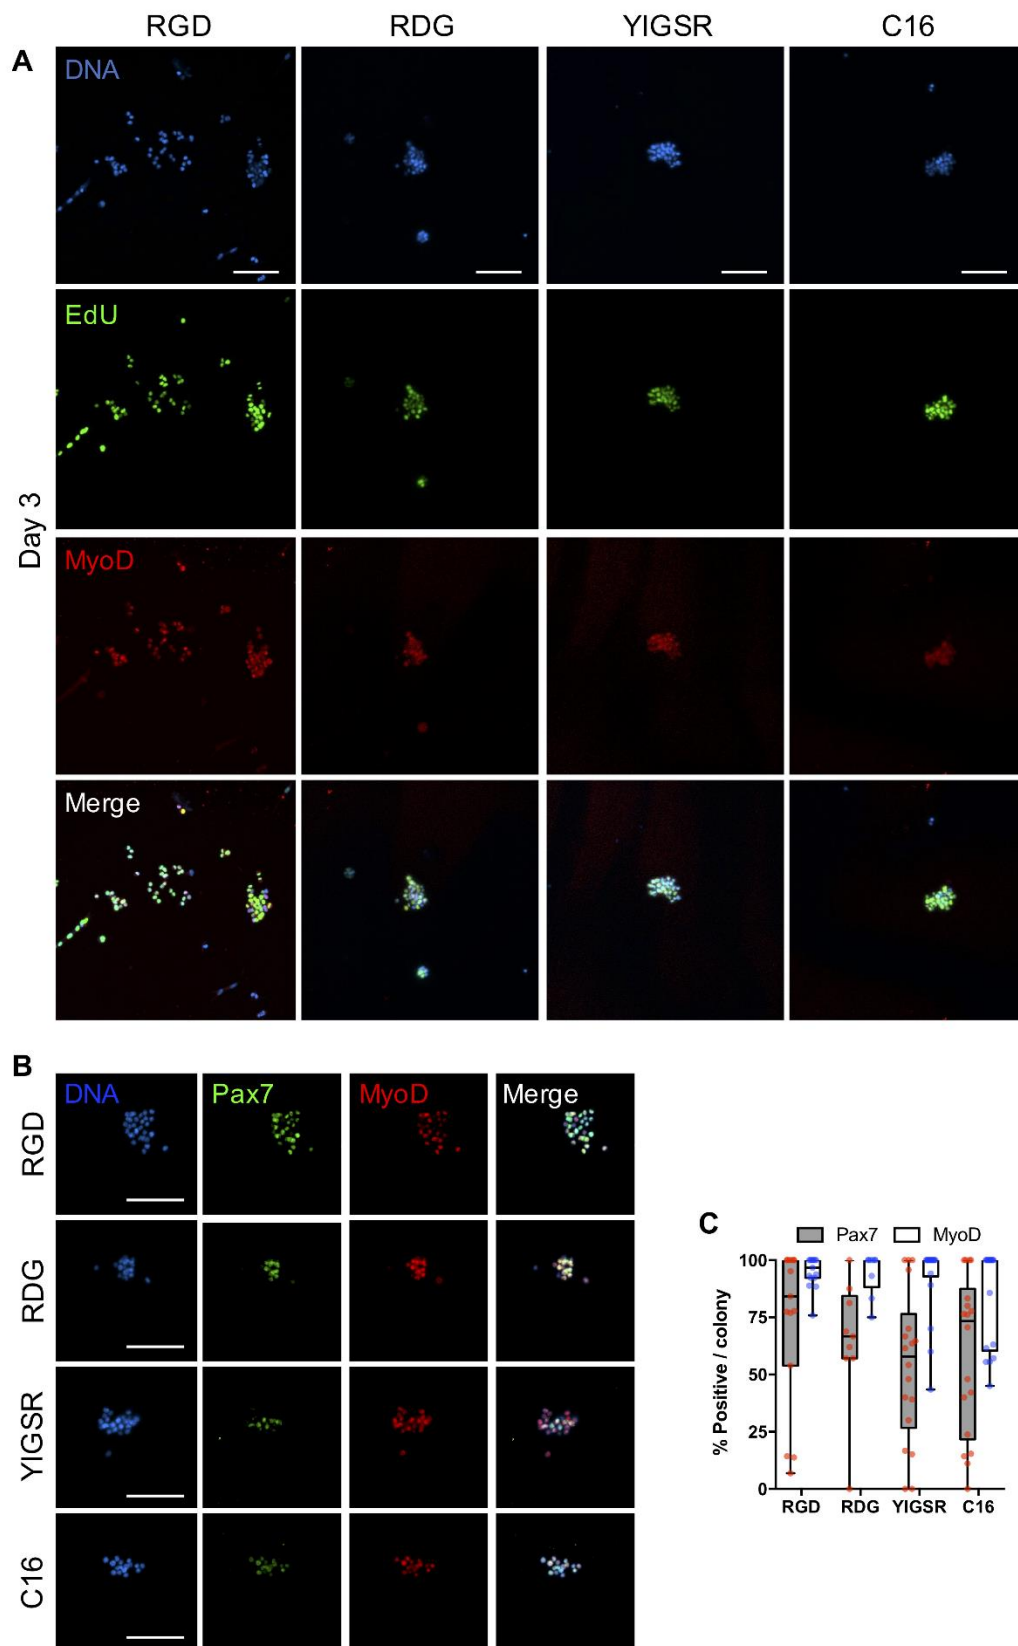

**Fig. S2. RGD-presenting hydrogels promote MuSC activation and proliferation.** (A) Representative z-projections myogenic colonies formed in hydrogels presenting synthetic cell adhesive peptides. Day 3. Scale bars: 100  $\mu$ m. (B) MuSCs encapsulated and cultured in PEG-4MAL hydrogels become activated (Pax7<sup>+</sup>/MyoD<sup>+</sup>) by 72 hours post-encapsulation in culture. Scale bars: 50  $\mu$ m. (C) Quantification of Pax7<sup>+</sup> and MyoD<sup>+</sup> cells. n=9-18.  $p=0.28$  (Pax7) and  $p=0.69$  (MyoD) Kruskal-Wallis test.

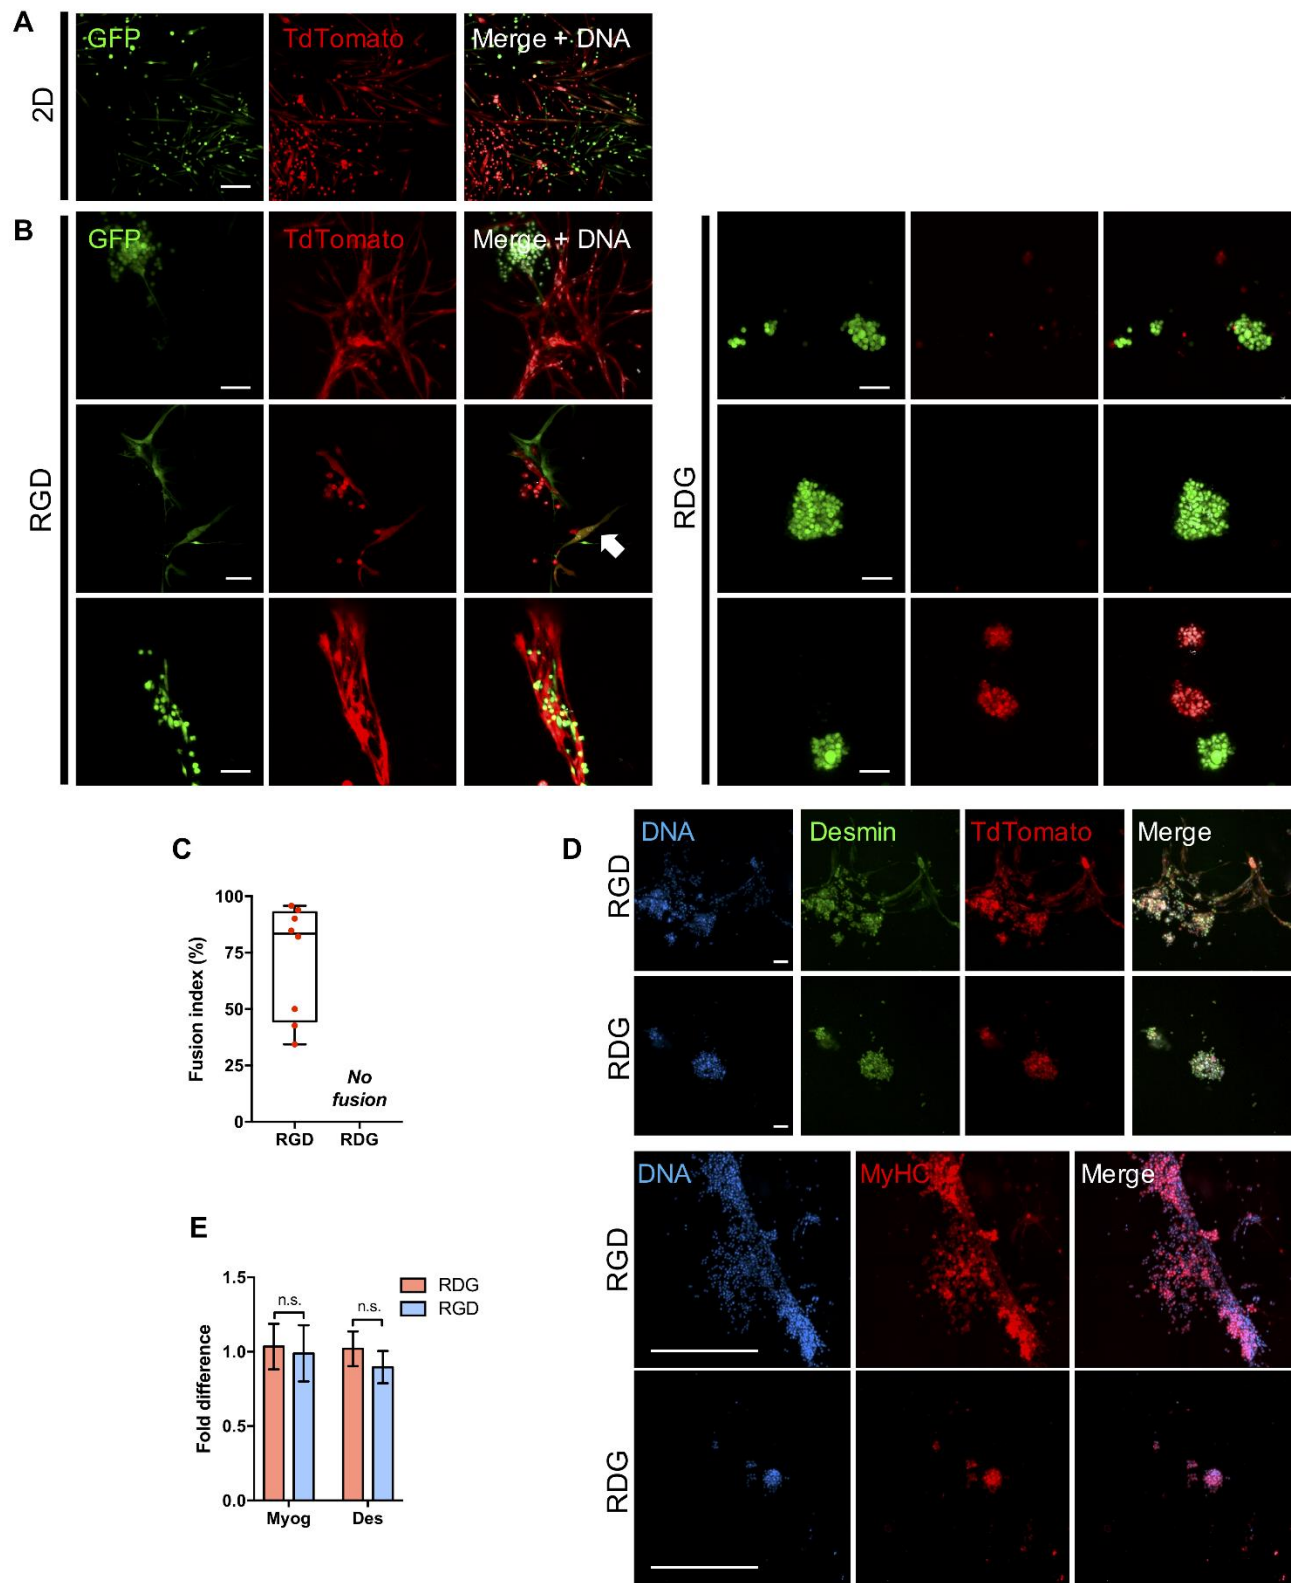

**Fig. S3. RGD-presenting hydrogels promote MuSC differentiation.** (A) Freshly isolated GFP<sup>+</sup> and TdTomato<sup>+</sup> MuSCs were seeded (1:1) collagen/laminin-coated tissue culture plastic to demonstrate fusion through co-expression of GFP and TdTomato. Scale bar: 200  $\mu$ m. (B) Freshly isolated GFP<sup>+</sup> and TdTomato<sup>+</sup> MuSCs were seeded (1:1) in PEG-4MAL hydrogels functionalized with RGD or RDG. Cells cultured in RGD-functionalized hydrogels fuse (arrow) and become more elongated compared to the cells cultured in RDG-functionalized hydrogels. Scale bar: 100  $\mu$ m. (C) Quantification of fusion index (%).  $n=8$ .  $p<0.0001$  via unpaired two-tailed  $t$ -test. (D) Cells cultured in both RGD- and RDG-functionalized hydrogels stain positive for desmin and myosin heavy chain (MyHC). Cells were cultured in growth media for 6 days, then in differentiation media for 4 days. Scale bars: 100  $\mu$ m (Desmin), 500  $\mu$ m (MyHC). (E) Quantification of myogenin and desmin gene expression.  $n=4-5$ . n.s.  $p>0.05$ . Mean  $\pm$  SEM.

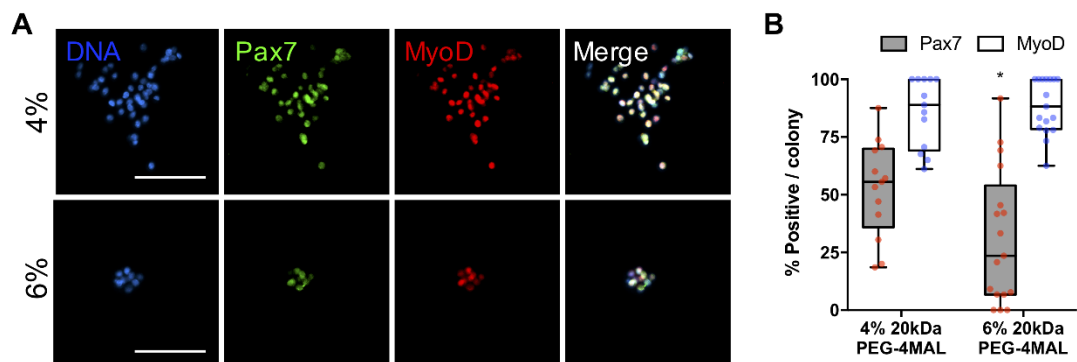

**Fig. S4. Pax7/MyoD expression of MuSCs in 4 and 6% 20-kDa PEG-4MAL hydrogels.** (A) MuSCs encapsulated and cultured in PEG-4MAL hydrogels become activated (Pax7<sup>+</sup>/MyoD<sup>+</sup>) by 76 hours post-encapsulation in culture. Scale bars: 50  $\mu$ m. (B) Quantification of Pax7<sup>+</sup> and MyoD<sup>+</sup> cells.  $n=13-17$ . \*  $p<0.05$  via unpaired  $t$ -test.

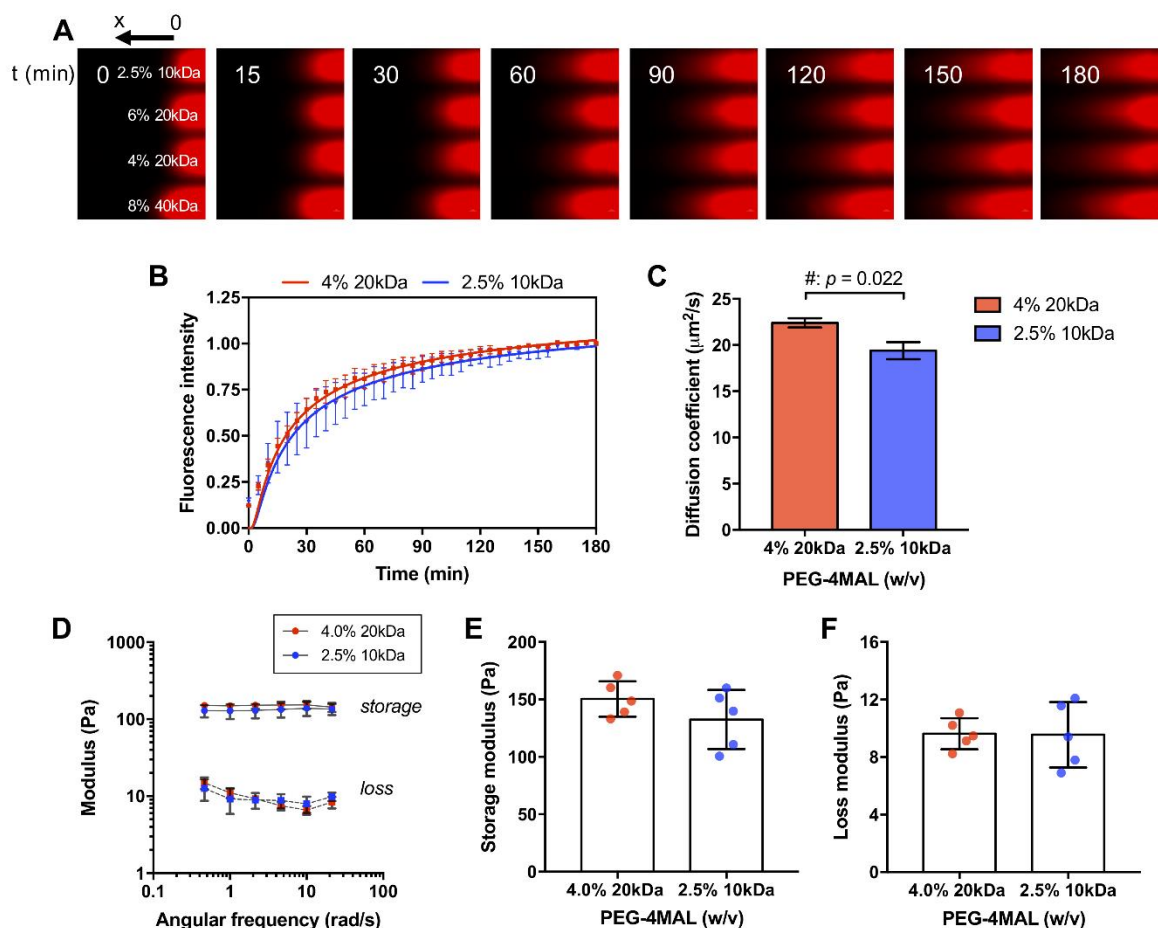

**Fig. S5. 1D diffusion assay in PEG-4MAL hydrogels.** (A) Representative micrographs of Alexa-555-labeled  $\alpha$ -bungartoxin (8 kDa) diffusing into PEG-4MAL gels over time. (B) Quantification of intensity. The solution of Fick's second law was fitted through the data to determine the diffusion coefficients.  $n=5$ . Mean  $\pm$  SEM. (C) Diffusion coefficients determined from curve fitting.  $n=5$ . Mean  $\pm$  SEM. (D-F) Rheological assessments of 4% 20 kDa and 2.5% 10 kDa PEG-4MAL hydrogels.  $n=5$ . Mean  $\pm$  SD. #  $p<0.05$  via unpaired two-tailed  $t$ -test.

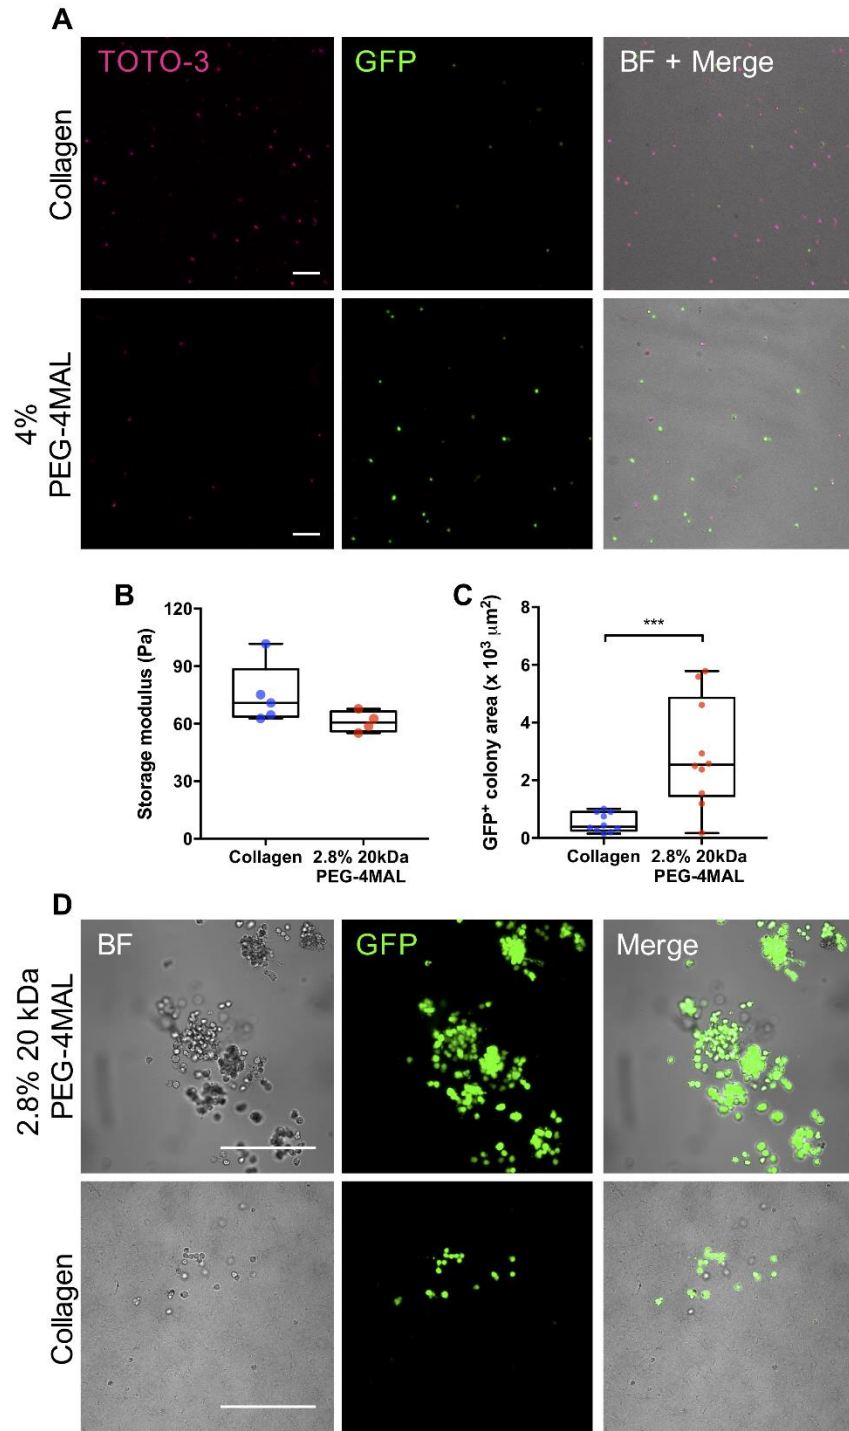

**Fig. S6. Synthetic matrix supports higher MuSC proliferation potential than collagen gel.** (A) Representative z-projections of GFP<sup>+</sup> MuSCs 1-day post-encapsulation in 4% PEG-4MAL hydrogel and 2.7 mg·ml<sup>-1</sup> collagen gel. Scale bars: 100 μm. (B) Storage modulus of 2.8% PEG-4MAL hydrogel and 2.7 mg·ml<sup>-1</sup> collagen gel. n=4-5.  $p=0.14$  via unpaired  $t$ -test. (C) Quantification of GFP<sup>+</sup> myogenic colony area in 4% PEG-4MAL hydrogel and 2.7 mg·ml<sup>-1</sup> collagen gel. n=10. \*\*\*  $p<0.001$  via unpaired two-tailed  $t$ -test. (D) Representative z-projections of GFP<sup>+</sup> MuSCs 3-days post-encapsulation in 2.8% PEG-4MAL hydrogel and 2.7 mg·ml<sup>-1</sup> collagen gel. Scale bars: 100 μm.

**Table S1. List of cell-adhesive synthetic peptides and their targets.**

| Common Name             | Sequence        | Targets                                                                                                                                                           |
|-------------------------|-----------------|-------------------------------------------------------------------------------------------------------------------------------------------------------------------|
| RGD                     | GRGDSPC         | $\alpha_v\beta_1$ , $\alpha_v\beta_3$ , $\alpha_v\beta_5$ , $\alpha_v\beta_6$ , $\alpha_v\beta_8$ , $\alpha_5\beta_1$ , $\alpha_8\beta_1$ , $\alpha_{IIb}\beta_3$ |
| RDG (scrambled control) | GRDGSPC         | N/A (inactive)                                                                                                                                                    |
| YIGSR                   | CGGEGYGEGYIGSR  | 67 kDa laminin receptor                                                                                                                                           |
| C16                     | CGGKAFDITYVRLKF | Syndecan, $\alpha_v\beta_3$ , $\alpha_5\beta_1$ , $\beta_1$                                                                                                       |
